# Supplementary material for: Male partner involvement in birth preparedness, complication readiness and obstetric emergencies in Sub-Saharan Africa: a scoping review
Source: Springer Nature journal article supplement (doi:10.1186/s12884-021-03606-x), 2021-02-12
Supplement: MOESM1 [file 18858880]

Supplementary Table Search strategy

| Concept                                       | Database                  | Mesh (different each database)                                                                                                                                                                                                                                                                                                                                                                                                                                                                                                                                                                                                                                                                 | Keywords (same each database)                                                                                                                                                                                                                                                                                                                                                                               |
|-----------------------------------------------|---------------------------|------------------------------------------------------------------------------------------------------------------------------------------------------------------------------------------------------------------------------------------------------------------------------------------------------------------------------------------------------------------------------------------------------------------------------------------------------------------------------------------------------------------------------------------------------------------------------------------------------------------------------------------------------------------------------------------------|-------------------------------------------------------------------------------------------------------------------------------------------------------------------------------------------------------------------------------------------------------------------------------------------------------------------------------------------------------------------------------------------------------------|
| Male involvement                              | Embase                    | spouse/ or domestic partner/ or husband/ or wife/                                                                                                                                                                                                                                                                                                                                                                                                                                                                                                                                                                                                                                              | Male* involve* or male* participat* or male attend* or male* engag* or husband* involve* or husband* participat* or husband* attend* or husband* engag* or spouse* involve* or spouse* participat* or spouse* attend* or spouse* engag* or father* involve* or father* participat* or father* attend* or father* engag* or paternal involve* or paternal participat* or paternal attend* or paternal engag* |
|                                               | MEDLINE                   | paternal behavior/ or spouses/ men/ or sexual partners/ or spouses/                                                                                                                                                                                                                                                                                                                                                                                                                                                                                                                                                                                                                            |                                                                                                                                                                                                                                                                                                                                                                                                             |
|                                               | Maternity and infant care | Male or Partners or Fathers or Participation                                                                                                                                                                                                                                                                                                                                                                                                                                                                                                                                                                                                                                                   |                                                                                                                                                                                                                                                                                                                                                                                                             |
| Birth preparedness and complication readiness | Embase                    | childbirth education/ or prenatal care/                                                                                                                                                                                                                                                                                                                                                                                                                                                                                                                                                                                                                                                        | Birth preparedness or complication readiness                                                                                                                                                                                                                                                                                                                                                                |
|                                               | MEDLINE                   | Prenatal Care/                                                                                                                                                                                                                                                                                                                                                                                                                                                                                                                                                                                                                                                                                 |                                                                                                                                                                                                                                                                                                                                                                                                             |
|                                               | Maternity and infant care | Pregnancy or Birth                                                                                                                                                                                                                                                                                                                                                                                                                                                                                                                                                                                                                                                                             |                                                                                                                                                                                                                                                                                                                                                                                                             |
| Obstetric emergencies                         | Embase                    | obstetric delivery/ or obstetric emergency/ or obstetric hemorrhage/ pregnancy complication/ pregnancy/ or reproduction/ or adolescent pregnancy/ or first trimester pregnancy/ or/ mother fetus relationship/ or multiple pregnancy/ or second trimester pregnancy/ or third trimester pregnancy/ or unplanned pregnancy/ or unwanted pregnancy/ or childbirth/                                                                                                                                                                                                                                                                                                                               | emergenc* or complication* or obstetric or maternal near miss or maternal mortality or obstetric morbidity or delivery or safe motherhood or haemorrhage                                                                                                                                                                                                                                                    |
|                                               | MEDLINE                   | Pregnancy Complications/ Pregnancy/ or Delivery, Obstetric/ or Obstetric Labor Complications/                                                                                                                                                                                                                                                                                                                                                                                                                                                                                                                                                                                                  |                                                                                                                                                                                                                                                                                                                                                                                                             |
|                                               | Maternity and infant care | Complications                                                                                                                                                                                                                                                                                                                                                                                                                                                                                                                                                                                                                                                                                  |                                                                                                                                                                                                                                                                                                                                                                                                             |
| Sub-Saharan Africa                            | Embase                    | africa south of the sahara"/ or africa/ or angola/ or benin/ or botswana/ or burkina faso/ or burundi/ or cameroon/ or cape verde/ or central africa/ or central african republic/ or chad/ or comoros/ or congo/ or cote d'ivoire/ or democratic republic congo/ or djibouti/ or equatorial guinea/ or eritrea/ or ethiopia/ or gabon/ or gambia/ or ghana/ or guinea/ or guinea-bissau/ or kenya/ or lesotho/ or liberia/ or madagascar/ or malawi/ or mali/ or mayotte/ or mozambique/ or namibia/ or niger/ or nigeria/ or rwanda/ or sahel/ or senegal/ or sierra leone/ or somalia/ or south africa/ or south sudan/ or sudan/ or swaziland/ or tanzania/ or togo/ or uganda/ or zambia/ |                                                                                                                                                                                                                                                                                                                                                                                                             |

|  |                           |                                                                                                                                                                                                                                                                                                                                                                                                                                                                                                                                                                                                                                                                                                                                                                          |  |
|--|---------------------------|--------------------------------------------------------------------------------------------------------------------------------------------------------------------------------------------------------------------------------------------------------------------------------------------------------------------------------------------------------------------------------------------------------------------------------------------------------------------------------------------------------------------------------------------------------------------------------------------------------------------------------------------------------------------------------------------------------------------------------------------------------------------------|--|
|  |                           | or zimbabwe/                                                                                                                                                                                                                                                                                                                                                                                                                                                                                                                                                                                                                                                                                                                                                             |  |
|  | MEDLINE                   | africa south of the sahara"/ or africa, central/ or africa, eastern/ or africa, southern/ or africa, western/ africa/ or cameroon/ or central african republic/ or chad/ or congo/ or "democratic republic of the congo"/ or equatorial guinea/ or gabon/ or "sao tome and principe"/ or burundi/ or djibouti/ or eritrea/ or ethiopia/ or kenya/ or rwanda/ or somalia/ or south sudan/ or sudan/ or tanzania/ or uganda/ or angola/ or botswana/ or lesotho/ or malawi/ or mozambique/ or namibia/ or south africa/ or swaziland/ or zambia/ or zimbabwe/ or benin/ or burkina faso/ or cabo verde/ or cote d'ivoire/ or gambia/ or ghana/ or guinea/ or guinea-bissau/ or liberia/ or mali/ or mauritania/ or niger/ or nigeria/ or senegal/ or sierra leone/ or togo |  |
|  | Maternity and infant care | Developing countries or Africa                                                                                                                                                                                                                                                                                                                                                                                                                                                                                                                                                                                                                                                                                                                                           |  |
